# Supplementary material for: Microfluidic Platform for Profiling of Extracellular Vesicles from Single Breast Cancer Cells
Source: PubMed Central journal article supplement — Anal Chem. 2023 Jan 6;95(3):1933–9. doi: 10.1021/acs.analchem.2c04106 (PMC9878503; doi:10.1021/acs.analchem.2c04106), 2023-01-06
Supplement: ac2c04106_si_001.pdf [file ac2c04106_si_001.pdf]

## Supplementary information

# A microfluidic platform for profiling of EVs from single breast cancer cells

Jonas M. Nikoloff, Mario A. Saucedo-Espinosa, and Petra S. Dittrich\*

Department of Biosystems Science and Engineering, ETH Zurich, Basel, Switzerland  
Mattenstrasse 26, CH-4125 Basel, Switzerland  
e-mail: petra.dittrich@bsse.ethz.ch

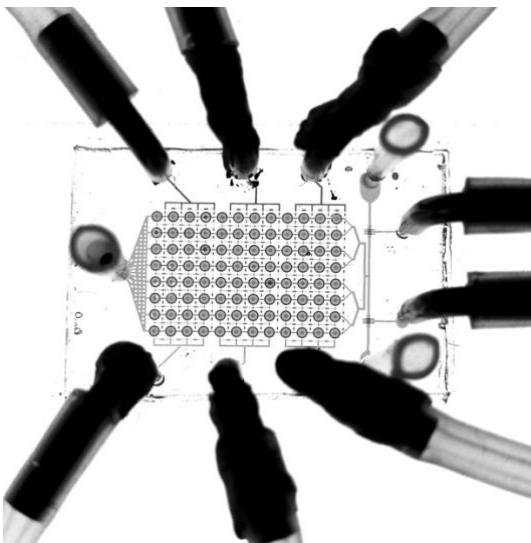

**Figure S1. Photograph of the device.** The size of the glass slide is 2 x 2.9 cm. Inlets and outlets of the fluid layer are pipette tips, while the pressure layers are connected via tubing to the pressure control system.

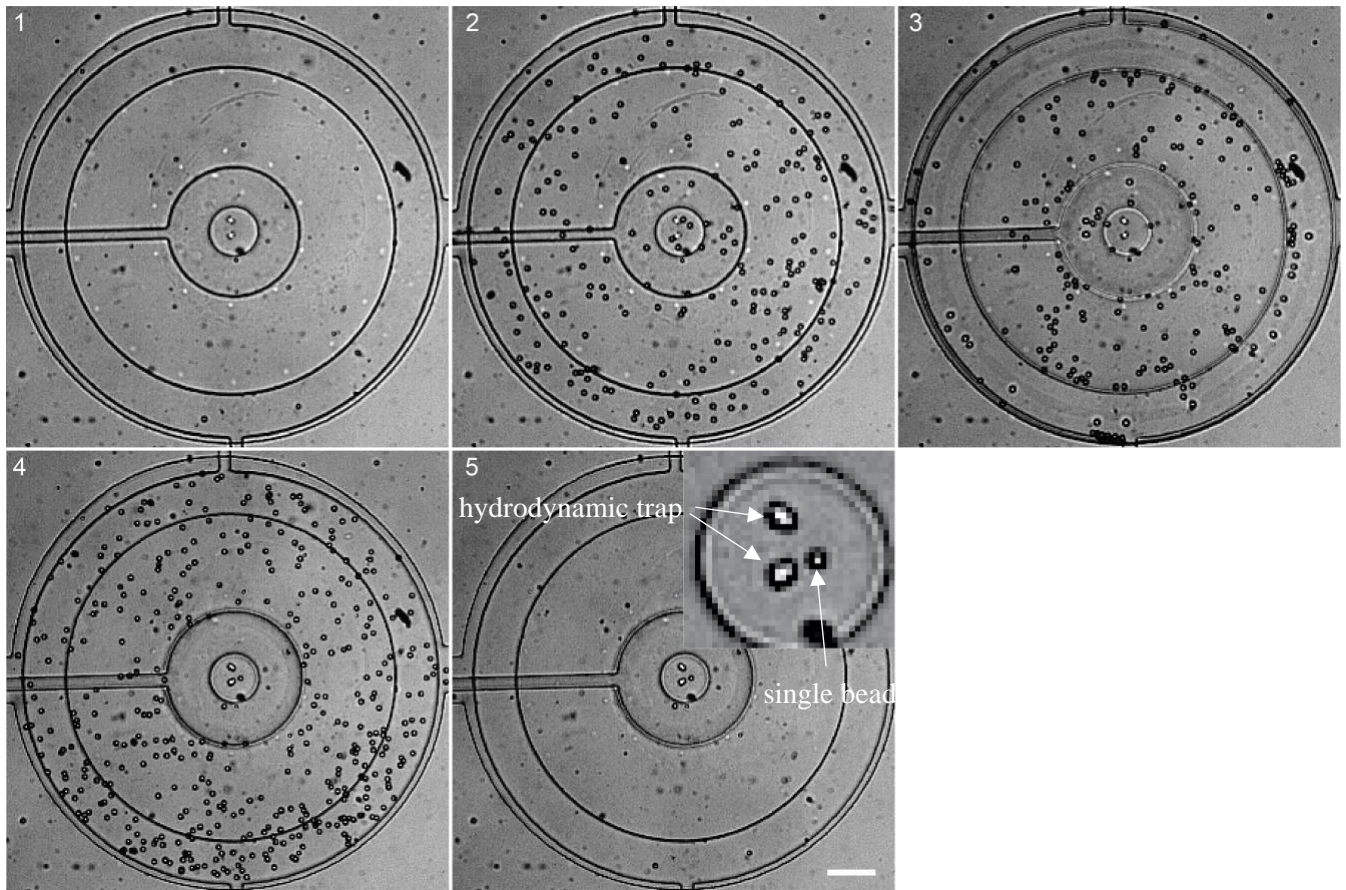

**Figure S2. Gap-free spatial isolation and control via separated pneumatic valves in two layers.** Using  $10\ \mu\text{m}$  beads as a cell surrogate, we tested the device by actuating the valves sequentially, to isolate single cells. Scalebar  $50\ \mu\text{m}$ .

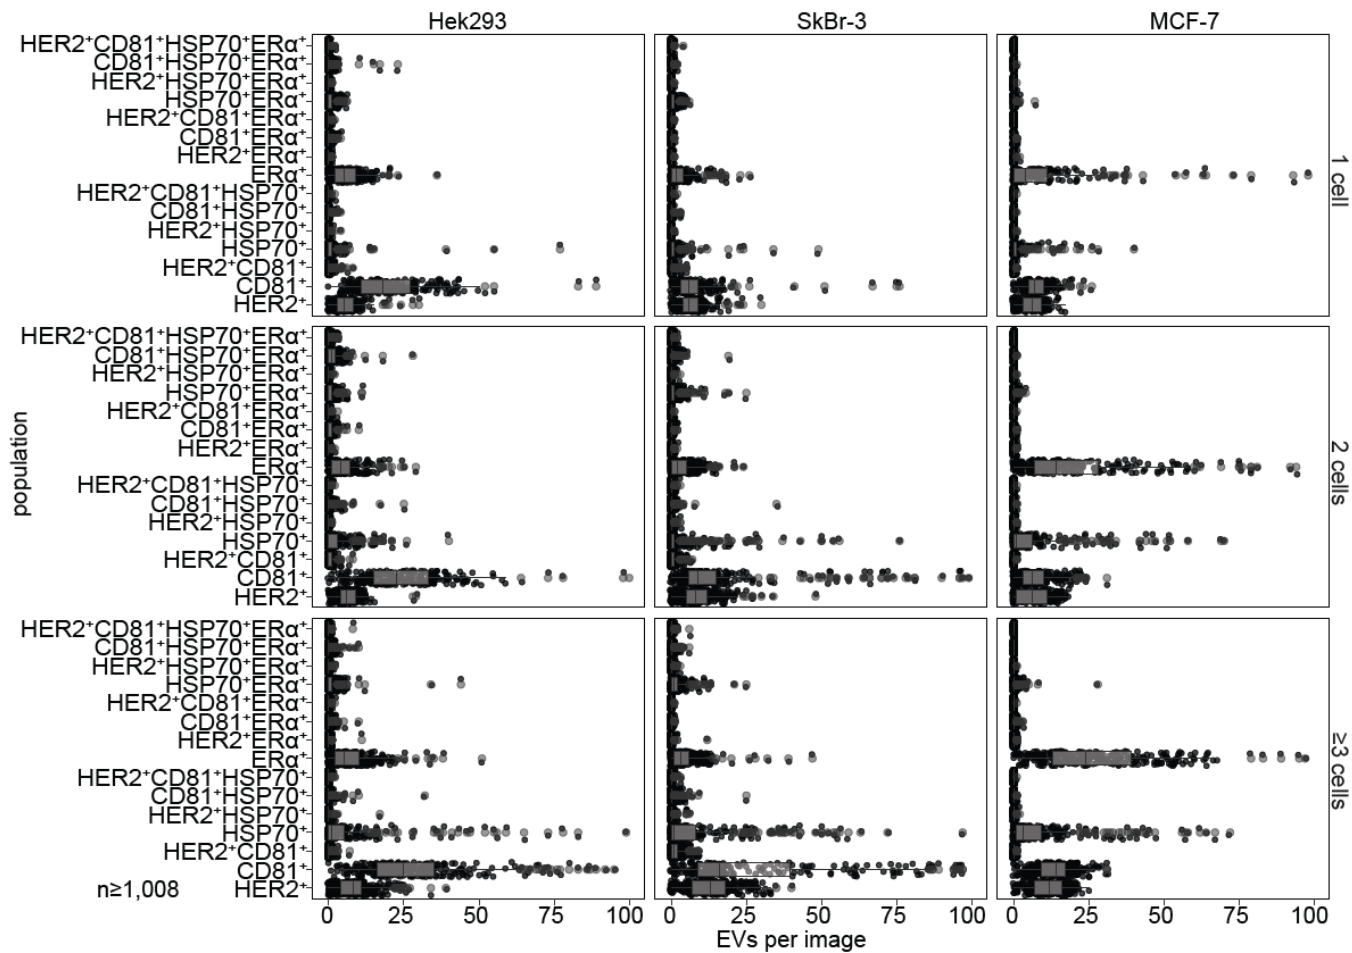

**Figure S3.** Phenotype analysis of secreted EVs. Dot plots depicting the absolute number of detected EVs, grouped by the cell type and the 15 possible phenotypes, when immobilized on anti-CD63 antibody. The first row depicts the data for 1 cell, the second and third line for two, three and more cells, respectively.

**Table SI 1:** Statistical test parameters of immobilized EV populations.

| Samples                                                  | Phenotypes    | Parameter 1     | Parameter 2                | Note         |
|----------------------------------------------------------|---------------|-----------------|----------------------------|--------------|
| 0 cell <sub>Hek293</sub>                                 | not specified | W = 0.77        | $p < 2.20 \times 10^{-16}$ | Shapiro Wilk |
| 1 cell <sub>Hek293</sub>                                 | not specified | W = 0.60        | $p < 2.20 \times 10^{-16}$ | Shapiro Wilk |
| 2 cells <sub>Hek293</sub>                                | not specified | W = 0.73        | $p < 2.20 \times 10^{-16}$ | Shapiro Wilk |
| $\geq 3$ cells <sub>Hek293</sub>                         | not specified | W = 0.86        | $p < 2.20 \times 10^{-16}$ | Shapiro Wilk |
| 0 cell <sub>MCF-7</sub>                                  | not specified | W = 0.73        | $p < 2.20 \times 10^{-16}$ | Shapiro Wilk |
| 1 cell <sub>MCF-7</sub>                                  | not specified | W = 0.71        | $p < 2.20 \times 10^{-16}$ | Shapiro Wilk |
| 2 cells <sub>MCF-7</sub>                                 | not specified | W = 0.89        | $p < 2.20 \times 10^{-16}$ | Shapiro Wilk |
| $\geq 3$ cells <sub>MCF-7</sub>                          | not specified | W = 0.97        | $p < 2.20 \times 10^{-16}$ | Shapiro Wilk |
| 0 cell <sub>SkBr-3</sub>                                 | not specified | W = 0.79        | $p < 2.20 \times 10^{-16}$ | Shapiro Wilk |
| 1 cell <sub>SkBr-3</sub>                                 | not specified | W = 0.49        | $p < 2.20 \times 10^{-16}$ | Shapiro Wilk |
| 2 cells <sub>SkBr-3</sub>                                | not specified | W = 0.69        | $p < 2.20 \times 10^{-16}$ | Shapiro Wilk |
| $\geq 3$ cells <sub>SkBr-3</sub>                         | not specified | W = 0.89        | $p < 2.20 \times 10^{-16}$ | Shapiro Wilk |
| 1 <sub>Hek293</sub> vs. 0 cell <sub>Hek293</sub>         | not specified | $D_{KS} = 0.30$ | $p < 2.20 \times 10^{-16}$ | two-sided KS |
| 2 <sub>Hek293</sub> vs. 1 cell <sub>Hek293</sub>         | not specified | $D_{KS} = 0.32$ | $p < 2.20 \times 10^{-16}$ | two-sided KS |
| $\geq 3$ <sub>Hek293</sub> vs. 2 cells <sub>Hek293</sub> | not specified | $D_{KS} = 0.19$ | $p < 2.20 \times 10^{-16}$ | two-sided KS |
| 1 <sub>SkBr-3</sub> vs. 0 cells <sub>SkBr-3</sub>        | not specified | $D_{KS} = 0.25$ | $p < 2.20 \times 10^{-16}$ | two-sided KS |
| 2 <sub>SkBr-3</sub> vs. 1 cell <sub>SkBr-3</sub>         | not specified | $D_{KS} = 0.31$ | $p < 2.20 \times 10^{-16}$ | two-sided KS |
| $\geq 3$ <sub>SkBr-3</sub> vs. 2 cells <sub>SkBr-3</sub> | not specified | $D_{KS} = 0.42$ | $p < 2.20 \times 10^{-16}$ | two-sided KS |
| 1 <sub>MCF-7</sub> vs. 0 cells <sub>MCF-7</sub>          | not specified | $D_{KS} = 0.44$ | $p < 2.20 \times 10^{-16}$ | two-sided KS |
| 2 <sub>MCF-7</sub> vs. 1 cell <sub>MCF-7</sub>           | not specified | $D_{KS} = 0.40$ | $p < 2.20 \times 10^{-16}$ | two-sided KS |
| $\geq 3$ <sub>MCF-7</sub> vs. 2 cells <sub>MCF-7</sub>   | not specified | $D_{KS} = 0.30$ | $p < 2.20 \times 10^{-16}$ | two-sided KS |

|                                                                       |                                     |                  |                            |              |
|-----------------------------------------------------------------------|-------------------------------------|------------------|----------------------------|--------------|
| 2 cells <sub>Hek293</sub> vs. 2 cells <sub>SkBr-3</sub>               | HER2 <sup>+</sup>                   | $D_{KS} = 0.21$  | $p = 1.42 \times 10^{-5}$  | two-sided KS |
| 2 cells <sub>SkBr-3</sub> vs. 2 cells <sub>MCF-7</sub>                | HER2 <sup>+</sup>                   | $D_{KS} = 0.22$  | $p = 1.15 \times 10^{-5}$  | two-sided KS |
| 2 cells <sub>Hek293</sub> vs. 2 cells <sub>MCF-7</sub>                | HER2 <sup>+</sup>                   | $D_{KS} = 0.21$  | $p = 9.32 \times 10^{-5}$  | two-sided KS |
| $\geq 3$ cells <sub>Hek293</sub> vs. $\geq 3$ cells <sub>SkBr-3</sub> | HER2 <sup>+</sup>                   | $D_{KS} = 0.33$  | $p = 3.64 \times 10^{-13}$ | two-sided KS |
| $\geq 3$ cells <sub>SkBr-3</sub> vs. $\geq 3$ cells <sub>MCF-7</sub>  | HER2 <sup>+</sup>                   | $D_{KS} = 0.16$  | $p = 3.43 \times 10^{-3}$  | two-sided KS |
| $\geq 3$ cells <sub>Hek293</sub> vs. $\geq 3$ cells <sub>MCF-7</sub>  | HER2 <sup>+</sup>                   | $D_{KS} = 0.28$  | $p = 3.42 \times 10^{-9}$  | two-sided KS |
| 2 cells <sub>Hek293</sub> vs. 2 cells <sub>SkBr-3</sub>               | HER2 <sup>+</sup> CD81 <sup>+</sup> | $D_{KS} = 0.06$  | $p = 0.78$                 | two-sided KS |
| 2 cells <sub>SkBr-3</sub> vs. 2 cells <sub>MCF-7</sub>                | HER2 <sup>+</sup> CD81 <sup>+</sup> | $D_{KS} = 0.24$  | $p = 5.58 \times 10^{-7}$  | two-sided KS |
| 2 cells <sub>Hek293</sub> vs. 2 cells <sub>MCF-7</sub>                | HER2 <sup>+</sup> CD81 <sup>+</sup> | $D_{KS} = 0.224$ | $p = 2.54 \times 10^{-6}$  | two-sided KS |
| $\geq 3$ cells <sub>Hek293</sub> vs. $\geq 3$ cells <sub>SkBr-3</sub> | HER2 <sup>+</sup> CD81 <sup>+</sup> | $D_{KS} = 0.38$  | $p < 2.2 \times 10^{-16}$  | two-sided KS |
| $\geq 3$ cells <sub>SkBr-3</sub> vs. $\geq 3$ cells <sub>MCF-7</sub>  | HER2 <sup>+</sup> CD81 <sup>+</sup> | $D_{KS} = 0.51$  | $p = 2.2 \times 10^{-16}$  | two-sided KS |
| $\geq 3$ cells <sub>Hek293</sub> vs. $\geq 3$ cells <sub>MCF-7</sub>  | HER2 <sup>+</sup> CD81 <sup>+</sup> | $D_{KS} = 0.13$  | $p = 2.51 \times 10^{-2}$  | two-sided KS |
| 1 cell <sub>Hek293</sub> vs. 1 cell <sub>SkBr-3</sub>                 | ER $\alpha$ <sup>+</sup>            | $D_{KS} = 0.35$  | $p = 1.02 \times 10^{-11}$ | two-sided KS |
| 1 cell <sub>SkBr-3</sub> vs. 1 cell <sub>MCF-7</sub>                  | ER $\alpha$ <sup>+</sup>            | $D_{KS} = 0.29$  | $p = 8.34 \times 10^{-8}$  | two-sided KS |
| 1 cells <sub>Hek293</sub> vs. 1 cells <sub>MCF-7</sub>                | ER $\alpha$ <sup>+</sup>            | $D_{KS} = 0.15$  | $p = 1.24 \times 10^{-2}$  | two-sided KS |
| 2 cells <sub>Hek293</sub> vs. 2 cells <sub>SkBr-3</sub>               | ER $\alpha$ <sup>+</sup>            | $D_{KS} = 0.60$  | $p < 2.2 \times 10^{-16}$  | two-sided KS |
| 2 cells <sub>SkBr-3</sub> vs. 2 cells <sub>MCF-7</sub>                | ER $\alpha$ <sup>+</sup>            | $D_{KS} = 0.60$  | $p < 2.2 \times 10^{-16}$  | two-sided KS |
| 2 cells <sub>Hek293</sub> vs. 2 cells <sub>MCF-7</sub>                | ER $\alpha$ <sup>+</sup>            | $D_{KS} = 0.54$  | $p = 2.2 \times 10^{-6}$ ; | two-sided KS |
| $\geq 3$ cells <sub>Hek293</sub> vs. $\geq 3$ cells <sub>SkBr-3</sub> | ER $\alpha$ <sup>+</sup>            | $D_{KS} = 0.38$  | $p < 2.2 \times 10^{-16}$  | two-sided KS |
| $\geq 3$ cells <sub>SkBr-3</sub> vs. $\geq 3$ cells <sub>MCF-7</sub>  | ER $\alpha$ <sup>+</sup>            | $D_{KS} = 0.51$  | $p < 2.2 \times 10^{-16}$  | two-sided KS |
| $\geq 3$ cells <sub>Hek293</sub> vs. $\geq 3$ cells <sub>MCF-7</sub>  | ER $\alpha$ <sup>+</sup>            | $D_{KS} = 0.13$  | $p = 2.51 \times 10^{-2}$  | two-sided KS |
| 1 cell <sub>Hek293</sub> vs. 1 cell <sub>SkBr-3</sub>                 | ER $\alpha$ <sup>+</sup> HSP70      | $D_{KS} = 0.04$  | $p = 0.99$ ;               | two-sided KS |
| 1 cell <sub>SkBr-3</sub> vs. 1 cell <sub>MCF-7</sub>                  | ER $\alpha$ <sup>+</sup> HSP70      | $D_{KS} = 0.31$  | $p = 1.38 \times 10^{-8}$  | two-sided KS |

|                                                                     |                                                  |                 |                            |              |
|---------------------------------------------------------------------|--------------------------------------------------|-----------------|----------------------------|--------------|
| 1 cell <sub>Hek293</sub> vs. 1 cell <sub>MCF-7</sub>                | ER $\alpha$ <sup>+</sup> HSP70                   | $D_{KS} = 0.26$ | $p = 6.97 \times 10^{-7}$  | two-sided KS |
| 2 cell <sub>Hek293</sub> vs. 2 cell <sub>SkBr-3</sub>               | ER $\alpha$ <sup>+</sup> HSP70                   | $D_{KS} = 0.05$ | $p = 0.89$                 | two-sided KS |
| 2 cell <sub>SkBr-3</sub> vs. 2 cell <sub>MCF-7</sub>                | ER $\alpha$ <sup>+</sup> HSP70                   | $D_{KS} = 0.36$ | $p = 3.78 \times 10^{-15}$ | two-sided KS |
| 2 cell <sub>Hek293</sub> vs. 2 cell <sub>MCF-7</sub>                | ER $\alpha$ <sup>+</sup> HSP70                   | $D_{KS} = 0.34$ | $p = 3.69 \times 10^{-12}$ | two-sided KS |
| $\geq 3$ cell <sub>Hek293</sub> vs. $\geq 3$ cell <sub>SkBr-3</sub> | ER $\alpha$ <sup>+</sup> HSP70                   | $D_{KS} = 0.24$ | $p = 3.66 \times 10^{-7}$  | two-sided KS |
| $\geq 3$ cell <sub>SkBr-3</sub> vs. $\geq 3$ cell <sub>MCF-7</sub>  | ER $\alpha$ <sup>+</sup> HSP70                   | $D_{KS} = 0.43$ | $p < 2.2 \times 10^{-16}$  | two-sided KS |
| $\geq 3$ cell <sub>Hek293</sub> vs. $\geq 3$ cell <sub>MCF-7</sub>  | ER $\alpha$ <sup>+</sup> HSP70                   | $D_{KS} = 0.19$ | $p = 2.24 \times 10^{-4}$  | two-sided KS |
| 1 cell <sub>Hek293</sub> vs. 1 cell <sub>SkBr-3</sub>               | CD81 <sup>+</sup> ER $\alpha$ <sup>+</sup> HSP70 | $D_{KS} = 0.14$ | $p = 2.69 \times 10^{-2}$  | two-sided KS |
| 1 cell <sub>SkBr-3</sub> vs. 1 cell <sub>MCF-7</sub>                | CD81 <sup>+</sup> ER $\alpha$ <sup>+</sup> HSP70 | $D_{KS} = 0.09$ | $p = 0.39$                 | two-sided KS |
| 1 cell <sub>Hek293</sub> vs. 1 cell <sub>MCF-7</sub>                | CD81 <sup>+</sup> ER $\alpha$ <sup>+</sup> HSP70 | $D_{KS} = 0.23$ | $p = 1.87 \times 10^{-5}$  | two-sided KS |
| 2 cell <sub>Hek293</sub> vs. 2 cell <sub>SkBr-3</sub>               | CD81 <sup>+</sup> ER $\alpha$ <sup>+</sup> HSP70 | $D_{KS} = 0.32$ | $p = 5.67 \times 10^{-12}$ | two-sided KS |
| 2 cell <sub>SkBr-3</sub> vs. 2 cell <sub>MCF-7</sub>                | CD81 <sup>+</sup> ER $\alpha$ <sup>+</sup> HSP70 | $D_{KS} = 0.19$ | $p = 2.3 \times 10^{-4}$   | two-sided KS |
| 2 cell <sub>Hek293</sub> vs. 2 cell <sub>MCF-7</sub>                | CD81 <sup>+</sup> ER $\alpha$ <sup>+</sup> HSP70 | $D_{KS} = 0.51$ | $p < 2.2 \times 10^{-16}$  | two-sided KS |
| $\geq 3$ cell <sub>Hek293</sub> vs. $\geq 3$ cell <sub>SkBr-3</sub> | CD81 <sup>+</sup> ER $\alpha$ <sup>+</sup> HSP70 | $D_{KS} = 0.04$ | $p = 0.99$                 | two-sided KS |
| $\geq 3$ cell <sub>SkBr-3</sub> vs. $\geq 3$ cell <sub>MCF-7</sub>  | CD81 <sup>+</sup> ER $\alpha$ <sup>+</sup> HSP70 | $D_{KS} = 0.23$ | $p = 2.39 \times 10^{-6}$  | two-sided KS |
| $\geq 3$ cell <sub>Hek293</sub> vs. $\geq 3$ cell <sub>MCF-7</sub>  | CD81 <sup>+</sup> ER $\alpha$ <sup>+</sup> HSP70 | $D_{KS} = 0.19$ | $p = 1.54 \times 10^{-4}$  | two-sided KS |
| 1 cell <sub>Hek293</sub> vs. 1 cell <sub>SkBr-3</sub>               | CD81 <sup>+</sup>                                | $D_{KS} = 0.57$ | $p < 2.2 \times 10^{-16}$  | two-sided KS |
| 1 cell <sub>SkBr-3</sub> vs. 1 cell <sub>MCF-7</sub>                | CD81 <sup>+</sup>                                | $D_{KS} = 0.17$ | $p = 8.17 \times 10^{-3}$  | two-sided KS |
| 1 cell <sub>Hek293</sub> vs. 1 cell <sub>MCF-7</sub>                | CD81 <sup>+</sup>                                | $D_{KS} = 0.61$ | $p < 2.2 \times 10^{-16}$  | two-sided KS |
| 2 cell <sub>Hek293</sub> vs. 2 cell <sub>SkBr-3</sub>               | CD81 <sup>+</sup>                                | $D_{KS} = 0.65$ | $p < 2.2 \times 10^{-16}$  | two-sided KS |
| 2 cell <sub>SkBr-3</sub> vs. 2 cell <sub>MCF-7</sub>                | CD81 <sup>+</sup>                                | $D_{KS} = 0.27$ | $p = 8.08 \times 10^{-8}$  | two-sided KS |
| 2 cell <sub>Hek293</sub> vs. 2 cell <sub>MCF-7</sub>                | CD81 <sup>+</sup>                                | $D_{KS} = 0.71$ | $p < 2.2 \times 10^{-16}$  | two-sided KS |
| $\geq 3$ cell <sub>Hek293</sub> vs. $\geq 3$ cell <sub>SkBr-3</sub> | CD81 <sup>+</sup>                                | $D_{KS} = 0.69$ | $p < 2.2 \times 10^{-16}$  | two-sided KS |

|                                                                       |                                      |                 |                            |              |
|-----------------------------------------------------------------------|--------------------------------------|-----------------|----------------------------|--------------|
| $\geq 3$ cells <sub>SkBr-3</sub> vs. $\geq 3$ cells <sub>MCF-7</sub>  | CD81 <sup>+</sup>                    | $D_{KS} = 0.57$ | $p < 2.2 \times 10^{-16}$  | two-sided KS |
| $\geq 3$ cells <sub>Hek293</sub> vs. $\geq 3$ cells <sub>MCF-7</sub>  | CD81 <sup>+</sup>                    | $D_{KS} = 0.77$ | $p < 2.2 \times 10^{-16}$  | two-sided KS |
| 2 cells <sub>Hek293</sub> vs. 2 cells <sub>SkBr-3</sub>               | CD81 <sup>+</sup> HSP70 <sup>+</sup> | $D_{KS} = 0.08$ | $p = 0.39$                 | two-sided KS |
| 2 cells <sub>SkBr-3</sub> vs. 2 cells <sub>MCF-7</sub>                | CD81 <sup>+</sup> HSP70 <sup>+</sup> | $D_{KS} = 0.09$ | $p = 0.20$                 | two-sided KS |
| 2 cells <sub>Hek293</sub> vs. 2 cells <sub>MCF-7</sub>                | CD81 <sup>+</sup> HSP70 <sup>+</sup> | $D_{KS} = 0.17$ | $p = 1.96 \times 10^{-3}$  | two-sided KS |
| $\geq 3$ cells <sub>Hek293</sub> vs. $\geq 3$ cells <sub>SkBr-3</sub> | CD81 <sup>+</sup> HSP70 <sup>+</sup> | $D_{KS} = 0.08$ | $p = 0.43$                 | two-sided KS |
| $\geq 3$ cells <sub>SkBr-3</sub> vs. $\geq 3$ cells <sub>MCF-7</sub>  | CD81 <sup>+</sup> HSP70 <sup>+</sup> | $D_{KS} = 0.15$ | $p = 6.24 \times 10^{-3}$  | two-sided KS |
| $\geq 3$ cells <sub>Hek293</sub> vs. $\geq 3$ cells <sub>MCF-7</sub>  | CD81 <sup>+</sup> HSP70 <sup>+</sup> | $D_{KS} = 0.07$ | $p = 0.50$                 | two-sided KS |
| 2 cells <sub>Hek293</sub> vs. 2 cells <sub>SkBr-3</sub>               | HSP70 <sup>+</sup>                   | $D_{KS} = 0.10$ | $p = 0.14$                 | two-sided KS |
| 2 cells <sub>SkBr-3</sub> vs. 2 cells <sub>MCF-7</sub>                | HSP70 <sup>+</sup>                   | $D_{KS} = 0.25$ | $p = 1.35 \times 10^{-7}$  | two-sided KS |
| 2 cells <sub>Hek293</sub> vs. 2 cells <sub>MCF-7</sub>                | HSP70 <sup>+</sup>                   | $D_{KS} = 0.17$ | $p = 1.96 \times 10^{-3}$  | two-sided KS |
| $\geq 3$ cells <sub>Hek293</sub> vs. $\geq 3$ cells <sub>SkBr-3</sub> | HSP70 <sup>+</sup>                   | $D_{KS} = 0.13$ | $p = 1.93 \times 10^{-2}$  | two-sided KS |
| $\geq 3$ cells <sub>SkBr-3</sub> vs. $\geq 3$ cells <sub>MCF-7</sub>  | HSP70 <sup>+</sup>                   | $D_{KS} = 0.18$ | $p = 4.65 \times 10^{-4}$  | two-sided KS |
| $\geq 3$ cells <sub>Hek293</sub> vs. $\geq 3$ cells <sub>MCF-7</sub>  | HSP70 <sup>+</sup>                   | $D_{KS} = 0.31$ | $p = 1.74 \times 10^{-11}$ | two-sided KS |
